# Supplementary material for: Quantitative Comparison of Hand Kinematics Measured with a Markerless Commercial Head-Mounted Display and a Marker-Based Motion Capture System in Stroke Survivors
Source: MDPI journal article supplement (doi:10.3390/s23187906), 2023-09-15
Supplement: s1 [file s1]

---

## Supplementary Material

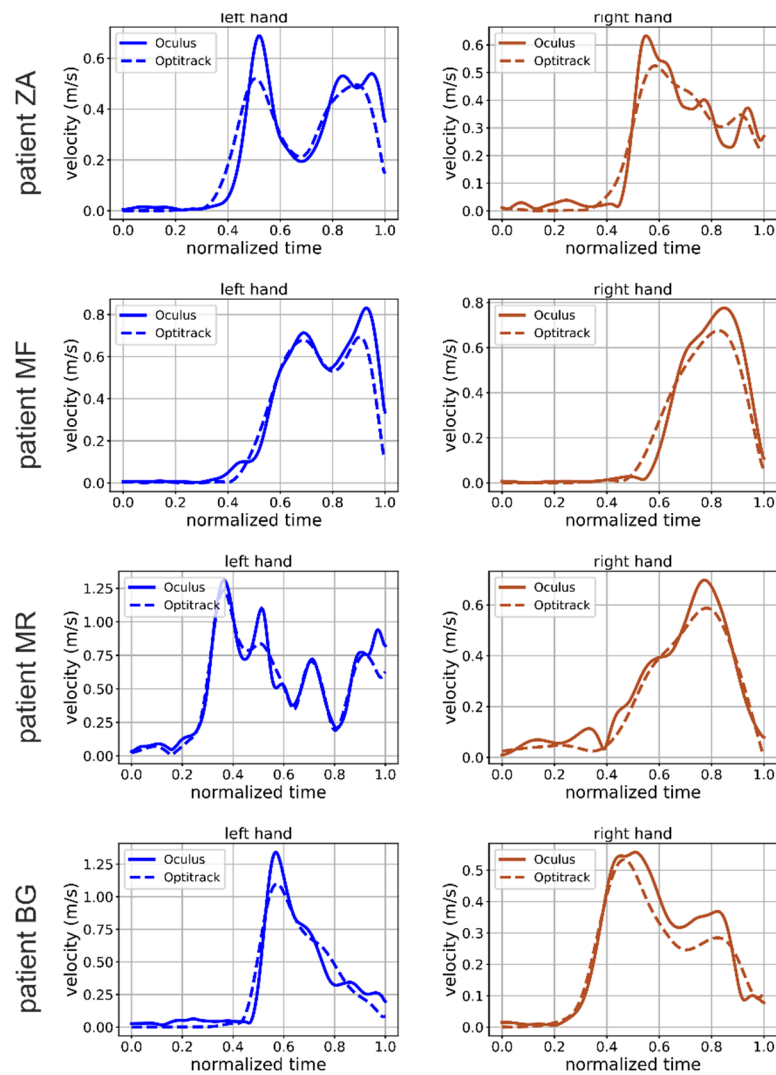

**Figure S1.** Examples of speed profiles computed from Oculus (solid line) and Optitrack (dashed line) data for the left (left column) and right (right column) hand, respectively for four different patients.

---
